# Supplementary material
Source: Springer Nature journal article supplement (https://www.springermedizin.de/resource/supplementary/12879_2008_770_MOESM15_ESM.pdf/9449848)

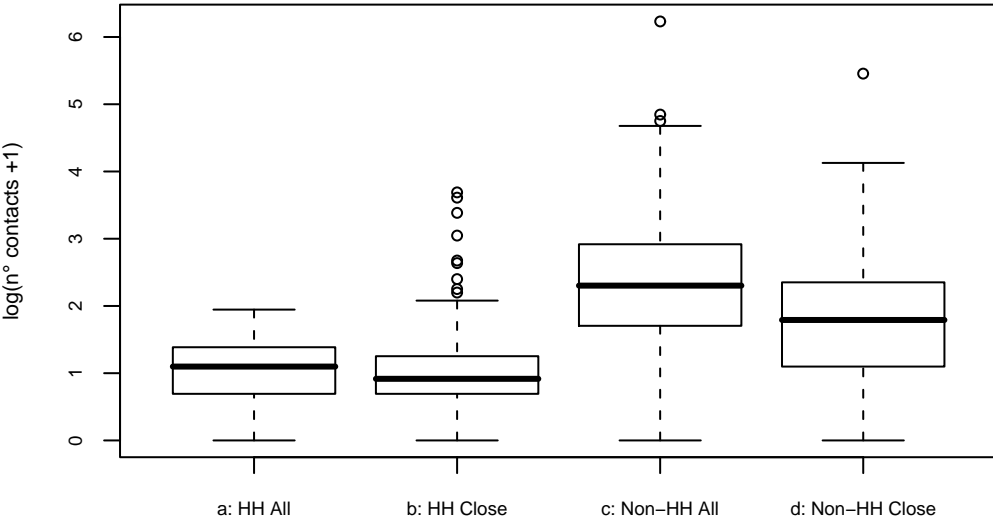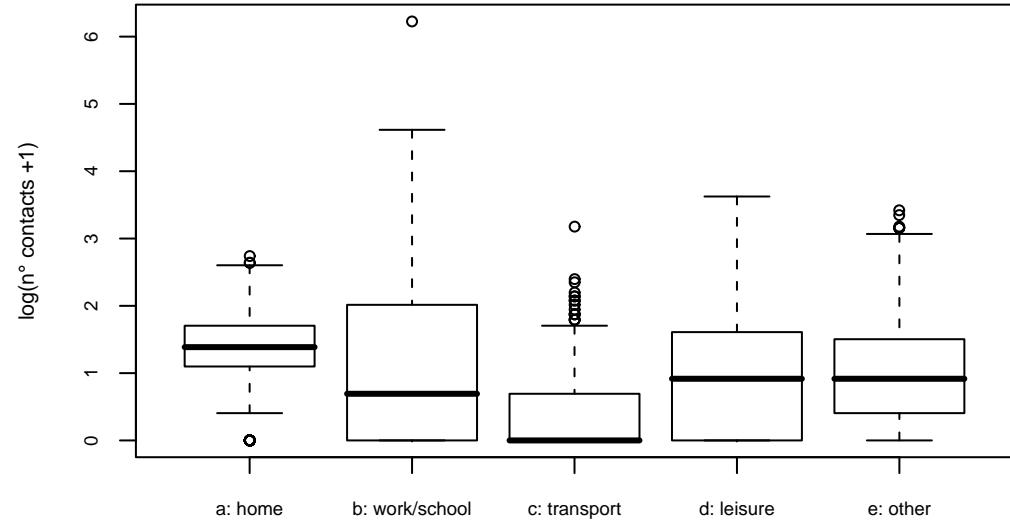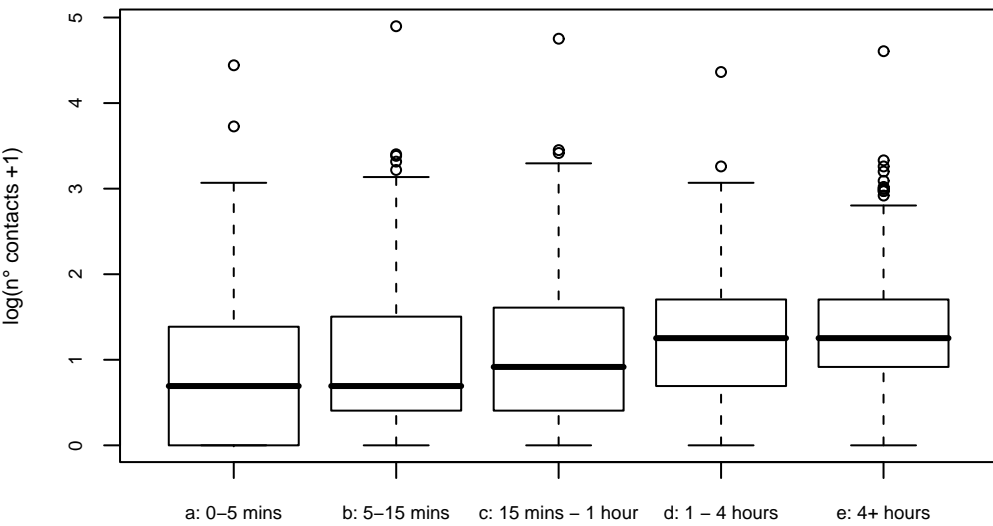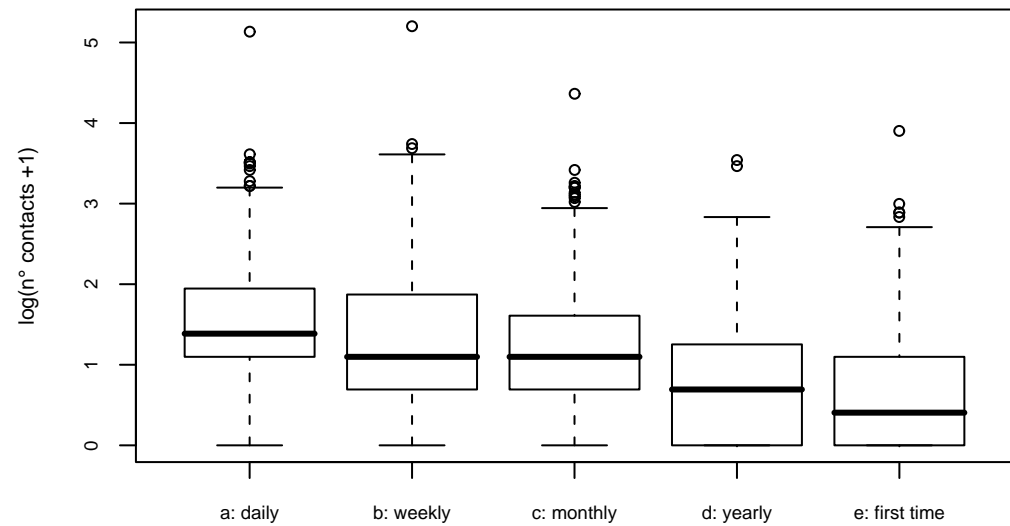

Supplement: MOESM15 [file 9449848]
